# Supplementary material
Source: publisher figshare collection journal article supplement (https://acs.figshare.com/ndownloader/files/14565110)
Supplement: Supplementary file 1 [file 14565110]

## Supporting Information

### **Direct Plasmon-Enhanced Electrochemistry for Enabling Ultrasensitive and Label-Free Detection of Circulating Tumor Cells in Blood**

Shan-Shan Wang,<sup>†</sup> Xiao-Ping Zhao,<sup>†</sup> Fei-Fei Liu,<sup>†</sup> Muhammad Rizwan Younis,<sup>‡</sup>  
Xing-Hua Xia,<sup>\*‡</sup> Chen Wang<sup>\*†</sup>

<sup>†</sup>Key Laboratory of Drug Quality Control and Pharmacovigilance, Ministry of Education; Key Laboratory of Biomedical Functional Materials, School of Science, China Pharmaceutical University, Nanjing, 211198, China

<sup>‡</sup>State Key Laboratory of Analytical Chemistry for Life Science, School of Chemistry and Chemical Engineering, Nanjing University, Nanjing 210093, China

\*To whom correspondence should be addressed. E-mail: [xhxia@nju.edu.cn](mailto:xhxia@nju.edu.cn);  
[wangchen@cpu.edu.cn](mailto:wangchen@cpu.edu.cn)

## Supporting Information Table of Contents

|                                                                                                                                 |      |
|---------------------------------------------------------------------------------------------------------------------------------|------|
| <b>Supplementary Figure S1.</b> SEM images of the AuNSs deposited on GC substrate before and after experiment.....              | S-4  |
| <b>Supplementary Figure S2.</b> CV curves of the AuNSs/GC electrode at 1st circle and 100th circle.....                         | S-4  |
| <b>Supplementary Figure S3.</b> The magnification of I-t curves of Figure 2B.....                                               | S-5  |
| <b>Supplementary Figure S4.</b> The current versus the concentrations of CCRF-CEM cells.....                                    | S-5  |
| <b>Supplementary Figure S5.</b> The detection of MCF-7 cells.....                                                               | S-6  |
| <b>Supplementary Figure S6.</b> Flow cytometry analysis of CCRF-CEM, K562, Raji cells .....                                     | S-6  |
| <b>Supplementary Figure S7.</b> Confocal microscopy images of CCRF-CEM, K562, Raji cells.....                                   | S-7  |
| <b>Supplementary Figure S8.</b> Fluorescence microscope images of CCRF-CEM cells after and before 808 nm laser irradiation..... | S-7  |
| <b>Supplementary Figure S9.</b> The detection CTCs in different samples.....                                                    | S-8  |
| <b>Supplementary Figure S10.</b> Confocal microscopy images of blood cells.....                                                 | S-8  |
| <b>Supplementary Figure S11.</b> Flow cytometry analysis of blood cells.....                                                    | S-9  |
| <b>Supplementary Table S1.</b> Values of $R_{ct}$ for the stepwise construction of the cytosensor.....                          | S-9  |
| <b>Supplementary Table S2.</b> Comparison of cytosensors performance for CCRF-CEM .....                                         | S-9  |
| <b>Supplementary Table S3.</b> Determination of CCRF-CEM cells in human blood (n=5) with the cytosensor.....                    | S-10 |

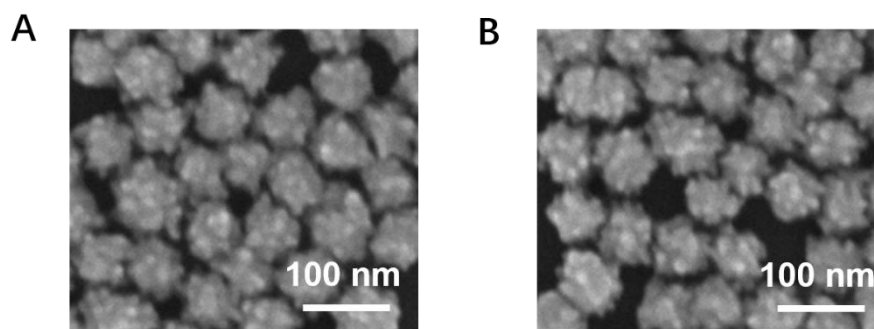

**Figure S1.** SEM images of the AuNSs deposited on GC substrate before (A) and after (B) experiment.

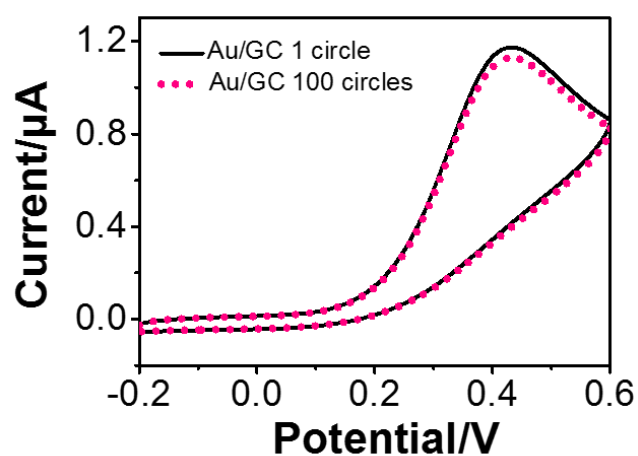

**Figure S2.** CV curves of the AuNSs/GC electrode in the presence of 1 mM AA at 1st circle and 100th circle.

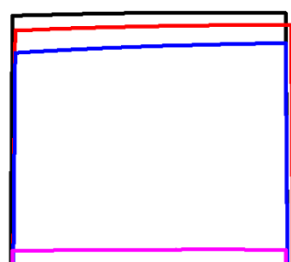

**Figure S3.** The magnification of I-t curves of Figure 2B.

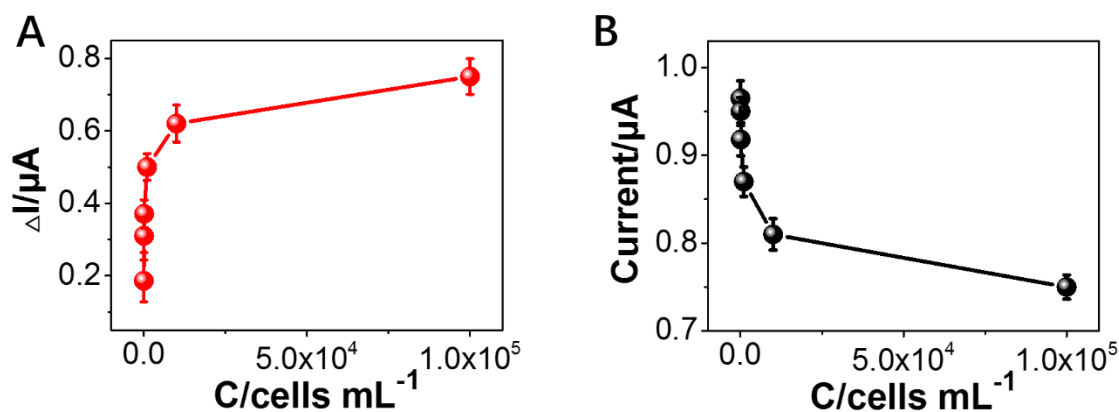

**Figure S4.** (A) The changed current value versus the concentrations of CCRF-CEM cells ranging from 5 to  $1 \times 10^5$  cells/mL. (B) The peak current values in Figure 5C versus the concentrations of CCRF-CEM cells ranging from 5 to  $1 \times 10^5$  cells/mL.

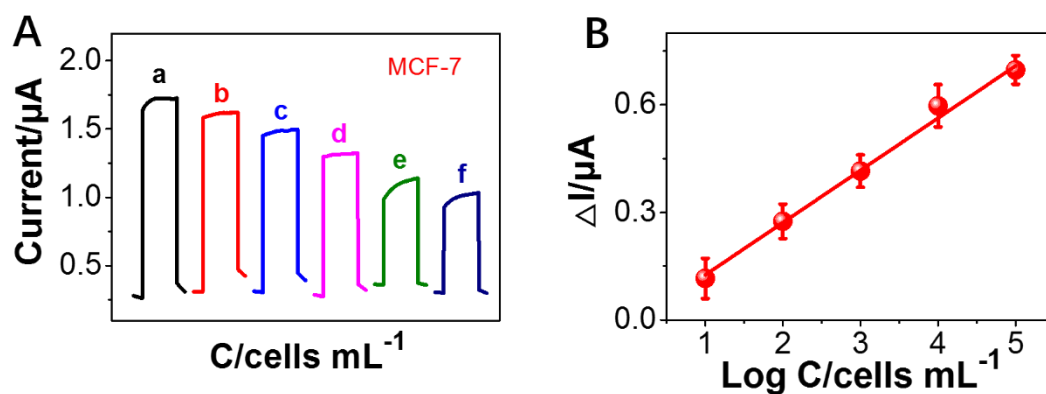

**Figure S5.** (A)  $I-t$  curves of the electrode after capturing different concentrations of MCF-7 cells with light on and off. The concentration of curve (a-f) is 0, 10,  $1 \times 10^2$ ,  $1 \times 10^3$ ,  $1 \times 10^4$ ,  $1 \times 10^5$  cells/mL respectively. (B) The linear relationship between the current change ( $\Delta I$ ) and the logarithm value of cells concentration in the range from 10 to  $1 \times 10^5$  cells/mL.

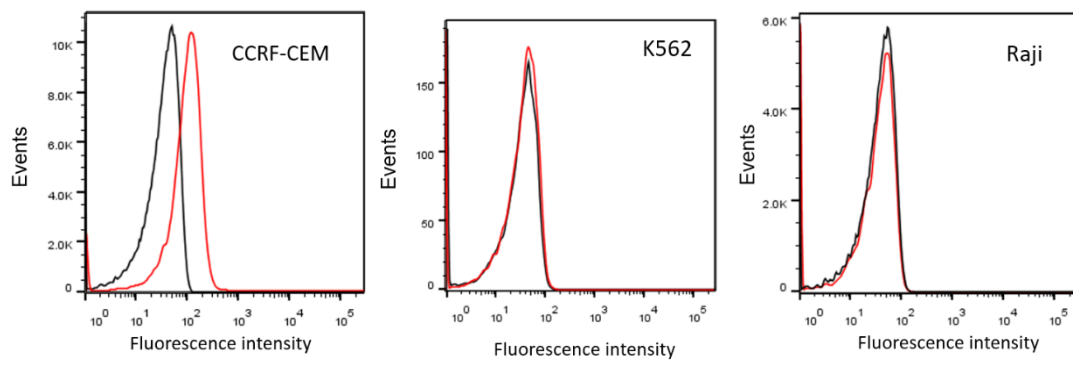

**Figure S6.** Flow cytometry analysis of CCRF-CEM, K562, Raji cells (Black curves, cells before incubation with FAM-sgc8c; Red curves, cells after incubation with FAM-sgc8c).

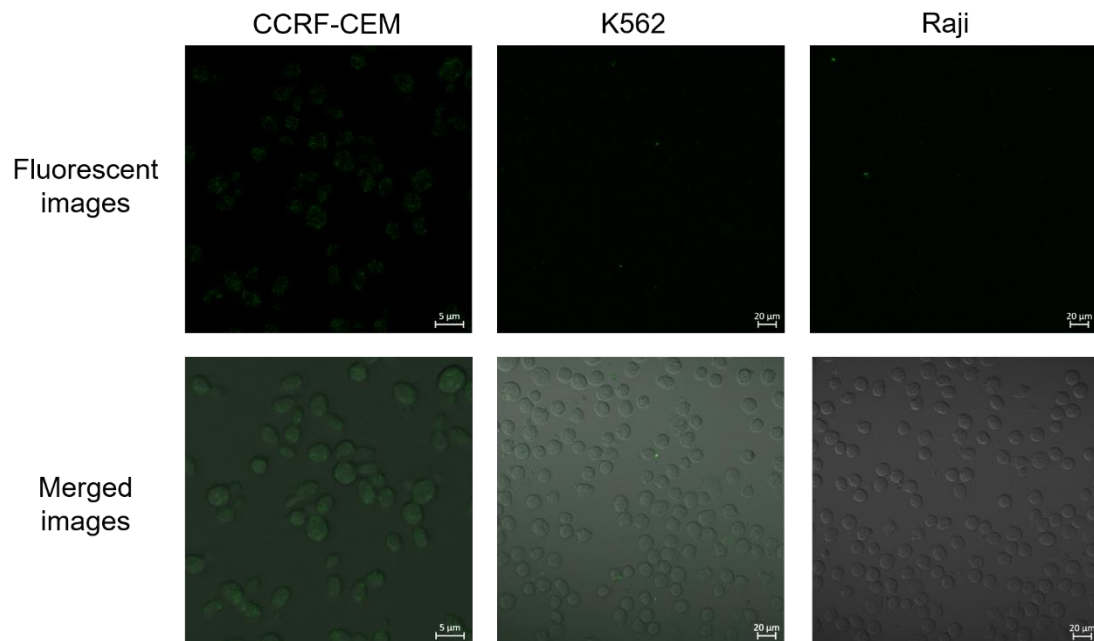

**Figure S7.** Confocal microscopy images of CCRF-CEM, K562, Raji cells incubated with FAM-Sgc8c.

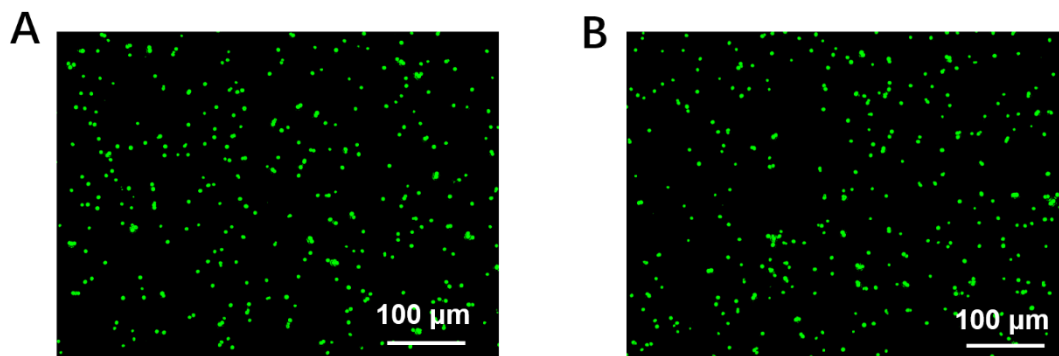

**Figure S8.** Fluorescence microscope images of CCRF-CEM cells after and before 808 nm laser irradiation (200 mW).

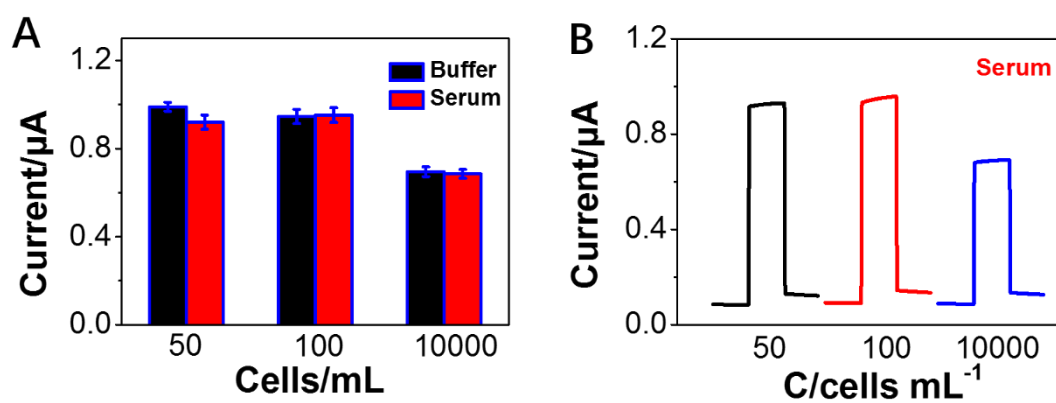

**Figure S9.** (A) The detection CTCs in different samples. Results were obtained from the PBS buffer solution and diluted human serum samples. (B) *I-t* curves of the aptamer/AuNSs/GC electrode incubation with different concentrations of CCRF-CEM cells in serum with light on and off.

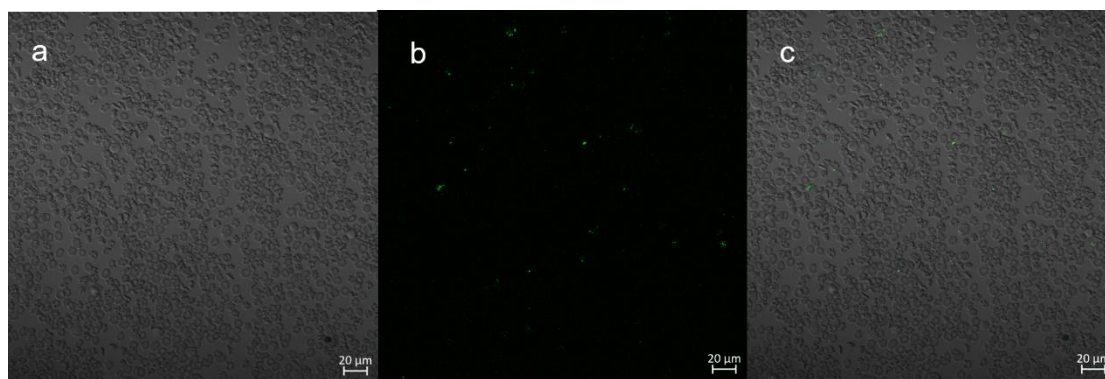

**Figure S10.** Confocal microscopy images of blood cells incubated with FAM-Sgc8c (a, Bright-field image; b, Fluorescent image; c, Merged image)

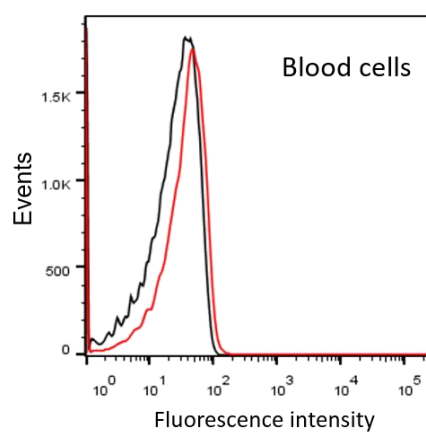

**Figure S11.** Flow cytometry analysis of blood cells. (Black curves, cells before incubation with FAM-sgc8c; Red curves, cells after incubation with FAM-sgc8c).

**Table S1: Values of Rct for the Stepwise Construction of the Cytosensor**

| assembly process | Rct ( $\Omega$ ) |
|------------------|------------------|
| bare GCE         | 444.523          |
| AuNSs            | 402.190          |
| Aptamer          | 520.683          |
| MCH              | 587.951          |
| CCRF-CEM cells   | 7117.912         |

**Table S2: Comparison of Cytosensors Performance for CCRF-CEM**

| Cytosensor                    | Detection method  | Linear range                           | Detection limit | Reference |
|-------------------------------|-------------------|----------------------------------------|-----------------|-----------|
| aptamer/GO                    | Fluorescence      | $1 \times 10^2$ - $1 \times 10^7$      | 100             | S1        |
| aptamer/GMNPs                 | DPV               | $10$ - $1 \times 10^6$                 | 10              | S2        |
| aptamer/ZnO<br>NDs@g-C3N4 QDs | I-t               | $20$ - $2 \times 10^4$                 | 20              | S3        |
| aptamer-PCR                   | Fluorescence      | $100$ - $2 \times 10^3$                | 100             | S4        |
| aptamer/PAA                   | LSV               | $100$ - $1 \times 10^6$                | 100             | S5        |
| aptamer- microfluidic         | Fluorescence      | $25$ - $2.5 \times 10^4$               | 25              | S6        |
| aptamer/Ag NCs                | Flow<br>cytometry | $7.5 \times 10^3$ - $6.25 \times 10^5$ | 7500            | S7        |
| HA-MNPs                       | QCM               | $8 \times 10^3$ - $1 \times 10^5$      | 8000            | S8        |
| aptamer/APBA-MWCNTs           | EIS               | $1 \times 10^3$ - $1 \times 10^7$      | 1000            | S9        |
| aptamer/AuNSs                 | I-t               | $5$ - $1 \times 10^5$                  | 5               | this work |

**Notes:** GO: graphene oxide; GMNPs: gold nanoparticles-coated magnetic  $\text{Fe}_3\text{O}_4$



nanoparticles; ZnO NDs@g-C<sub>3</sub>N<sub>4</sub> QDs: ZnO nanodisks@g-C<sub>3</sub>N<sub>4</sub> quantum dots; PCR: polymerase chain reaction; PAA: porous anodic alumina; Ag NCs: silver nanoclusters; HA-MNPs: hyaluronic acid-coated magnetic nanoparticles; APBA-MWCNTs: 3-aminophenylboronic acid-functionalized multiwalled carbon nanotubes; DPV: differential pulse voltammetry; LSV: linear sweep voltammetry; QCM, quartz crystal microbalance; EIS: electrochemical impedance spectroscopy.

**Table S3: Determination of CCRF-CEM Cells in Human Blood (n=5) with the Cytosensors.**

| Spiked cells (cells mL <sup>-1</sup> ) | Detected cells (cells mL <sup>-1</sup> ) | Recovery (%) | RSD (%) |
|----------------------------------------|------------------------------------------|--------------|---------|
| 50                                     | 58                                       | 116.00       | 6.88    |
| 100                                    | 106                                      | 106.00       | 5.33    |
| 1000                                   | 933                                      | 93.30        | 4.34    |
| 10000                                  | 9268                                     | 92.68        | 3.68    |

## REFERENCE

- (S1) Tan, J.; Lai, Z.; Zhong, L.; Zhang, Z.; Zheng, R.; Su, J.; Huang, Y.; Huang, P.; Song, H.; Yang, N.; Zhou, S.; Zhao, Y. A Graphene Oxide-Based Fluorescent Aptasensor for the Turn-on Detection of CCRF-CEM. *Nanoscale Res. Lett.* **2018**, *13*, 66.
- (S2) Khoshfetrat, S. M.; Mehrgardi, M. A. Amplified detection of leukemia cancer cells using an aptamer-conjugated gold-coated magnetic nanoparticles on a nitrogen-doped graphene modified electrode. *Bioelectrochemistry* **2017**, *114*, 24-32.
- (S3) Pang, X. H.; Cui, C.; Su, M. H.; Wang, Y. G.; Wei, Q.; Tan, W. H. Construction

- of self-powered cytosensing device based on ZnO nanodisks@ g-C<sub>3</sub>N<sub>4</sub> quantum dots and application in the detection of CCRF-CEM cells. *Nano energy* **2018**, *46*, 101-109.
- (S4) Tang, J. L.; He, X. X.; Lei, Y. L.; Shi, H.; Guo, Q. P.; Liu, J. B.; He, D.; Yan, L.; Wang, K. Temperature-responsive split aptamers coupled with polymerase chain reaction for label-free and sensitive detection of cancer cells. *Chem. Commun.* **2017**, *53*, 11889-11892.
- (S5) Cao, J.; Zhao, X. P.; Younis, M. R.; Li, Z. Q.; Xia, X. H.; Wang, C. Ultrasensitive Capture, Detection, and Release of Circulating Tumor Cells Using a Nanochannel-Ion Channel Hybrid Coupled with Electrochemical Detection Technique. *Anal. Chem.* **2017**, *89*, 10957-10964.
- (S6) Cao, L. L.; Cheng, L. W.; Zhang, Z. Y.; Wang, Y.; Zhang, X. X.; Chen, H.; Liu, B. H.; Zhang, S.; Kong, J. L. Visual and high-throughput detection of cancer cells using a graphene oxide-based FRET aptasensing microfluidic chip. *Lab. Chip.* **2012**, *12*, 4864-4869.
- (S7) Yin, J.; He, X.; Wang, K.; Xu, F.; Shangguan, J.; He, D.; Shi, H. Label-Free and Turn-on Aptamer Strategy for Cancer Cells Detection Based on a DNA–Silver Nanocluster Fluorescence upon Recognition-Induced Hybridization. *Anal. Chem.* **2013**, *85*, 12011-12019.
- (S8) Zhou, Y.; Xie, Q. Hyaluronic acid-coated magnetic nanoparticles-based selective collection and detection of leukemia cells with quartz crystal microbalance. *Sens. Actuators, B* **2016**, *223*, 9-14.
- (S9) Paredes-Aguilera, R.; Romero-Guzman, L.; Lopez-Santiago, N.; Burbano-Ceron, L.; Camacho-Del Monte, O.; Nieto-Martinez, S. Flow cytometric analysis of cell - surface and intracellular antigens in the diagnosis of acute leukemia. *Am. J. Hematol.* **2001**, *68*, 69-74.
